# Supplementary material for: Raman spectroscopy to unravel the magnetic properties of iron oxide nanocrystals for bio-related applications
Source: PubMed Central journal article supplement (PMC9418671; doi:10.1039/c9na00064j), 2019-04-23
Supplement: NA-001-C9NA00064J-s001.pdf [file NA-001-C9NA00064J-s001.pdf]

Electronic Supporting Information

# Raman Spectroscopy to unravel Magnetic Properties of Iron Oxide Nanocrystals for Bio-related Applications

*Martín Testa-Anta, Miguel A. Ramos-Docampo, Miguel Comesaña-Hermo,*

*Beatriz Rivas-Murias, Verónica Salgueiriño \**

Departamento de Física Aplicada, Universidade de Vigo, 36310 Vigo, Spain.

Université Paris Diderot, Sorbonne Paris Cité, ITODYS, UMR CNRS 7086, 75013, Paris, France

## **1. Description of the Raman equipment**

Figure S1 illustrates schematically the main parts of a Raman spectrometer. The sample (a monocrystal or powder of nanocrystals) is placed on a glass slide and illuminated by a monochromatic light source (laser) through a microscope objective. According to the scheme, this microscope objective collects both the incident and the scattered light and regulates as well the laser power illuminating the sample. To detect the small fraction of the Raman scattered radiation, the elastically-scattered light is first cut out by a filter, which is often a holographic notch or dielectric edge filter, such that the Raman scattered light can be subsequently focused by different optics and then split into its component wavelengths using a grating monochromator. At that point, a charge-coupled device (CCD) is used for detecting the intensity of the Raman scattered light.

Eventually, this signal is transferred to a computer where it is processed, displayed and stored by means of a specific software, which also controls the instrument and its motors.

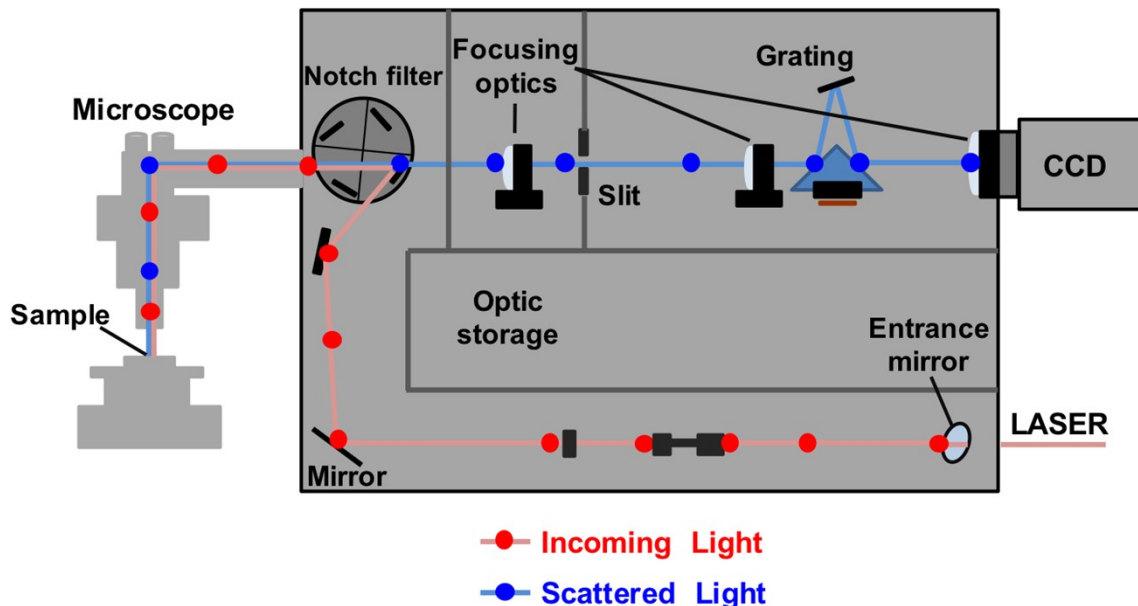

**Figure S1.** Scheme of a Raman spectrometer and microscope (using a visible laser) showing the path for the incoming (red) and scattered (blue) light.

For a Raman spectrum to be accurately registered, the adjustment of the laser excitation wavelength is crucial,<sup>1</sup> given the fact that it determines the excitation efficiency, the fluorescence, and the heat absorption of the sample. Since the Raman scattering efficiency is proportional to  $\lambda^{-4}$  (see equation 7 in the article, showing the Raman scattering intensity to be proportional to the fourth power of the incident light frequency ( $\nu_0$ )), the scan time becomes reduced as the laser wavelength decreases, while keeping constant all other conditions. Nevertheless, fluorescence emission processes may also interfere with the Raman scattering in the final spectra. Since the

fluorescence interference occurs at a lower energy than that of the excitation frequency, longer excitation wavelengths will give rise to better results in this regard.<sup>2</sup>

Furthermore, heat absorption is also an important process that can take place while registering a Raman spectrum, especially in the case of dark samples. In general, when using longer excitation wavelengths more light is absorbed and more heat is transferred to the sample, offering therefore broader Raman modes that can appear shifted to lower frequencies. Over a threshold, the transferred heat can modify the sample under study, inducing for example oxidation processes or structural transitions,<sup>3-5</sup> or even damaging the sample completely.

Typical commercial lasers used for Raman spectroscopy provide the following wavelengths: 532 nm (frequency doubled Nd:YAG and Nd:YVO<sub>4</sub> diode), 633 nm (He-Ne laser), 785 nm (Near Infrared (NIR) diode laser), 830 nm (GaAlAs) and 1064 nm (Nd:Y<sub>3</sub>Al<sub>5</sub>O<sub>12</sub>).

The spectra registered using different excitation wavelength can present slightly different features stemming from the following linked factors: a) the optical confocal depth, that decreases with decreasing wavelength for a given material, b) absorption, since a decrease in the laser wavelength can lead to an increase in absorption and consequent reduction of the penetration depth, and c) Raman cross section, the Raman intensity of a given material, depending on the exciting wavelength can lead to resonant Raman effects.<sup>6</sup>

## **2. Application of Group Theory to a discrete molecule AB<sub>4</sub>**

Aiming to clarify how group theory can be applied so as to figure out the optical phonon modes that will be Raman active for a particular crystal lattice, the theoretical concepts explained in Section 2.2 are herein detailed step-by-step. For simplicity, and owing to the large number of atoms present within a typical spinel unit cell, a discrete molecule has been selected to this end. Namely,

a tetrahedral molecule AB<sub>4</sub> (for example, methane (CH<sub>4</sub>) or carbon tetrachloride (CCl<sub>4</sub>)) will be used to determine the symmetry of the corresponding Raman active modes.

A general procedure to carry out this task involves the following steps:

i) **Determine the point group of the molecule under consideration and its corresponding character table.** Assuming a perfectly symmetric tetrahedral AB<sub>4</sub> molecule (see Figure S2a), the system belongs to the point group T<sub>d</sub>. The corresponding character table is shown in Table S-I.<sup>7</sup>

**Table S-I.** Character table for the T<sub>d</sub> point group.

| T <sub>d</sub><br>( $\bar{4}3m$ ) | E | 8C <sub>3</sub> | 3C <sub>2</sub> | 6S <sub>4</sub> | 6σ <sub>d</sub> |                                                     | (h=24)                                                                              |
|-----------------------------------|---|-----------------|-----------------|-----------------|-----------------|-----------------------------------------------------|-------------------------------------------------------------------------------------|
| A <sub>1</sub>                    | 1 | 1               | 1               | 1               | 1               |                                                     | x <sup>2</sup> +y <sup>2</sup> +z <sup>2</sup>                                      |
| A <sub>2</sub>                    | 1 | 1               | 1               | -1              | -1              |                                                     |                                                                                     |
| E                                 | 2 | -1              | 2               | 0               | 0               |                                                     | (2z <sup>2</sup> -x <sup>2</sup> -y <sup>2</sup> , x <sup>2</sup> -y <sup>2</sup> ) |
| T <sub>1</sub>                    | 3 | 0               | -1              | 1               | -1              | (R <sub>x</sub> , R <sub>y</sub> , R <sub>z</sub> ) |                                                                                     |
| T <sub>2</sub>                    | 3 | 0               | -1              | -1              | 1               | (x, y, z)                                           | (xy, xz, yz)                                                                        |

ii) **Choose a vector basis  $v$  to describe the molecule, and determine a reducible representation of the system in terms of that basis.** A simple vector basis  $v$  to describe the system can be defined by the three coordinate axes on each atom comprising the molecule (as schematically shown in Figure S2b).

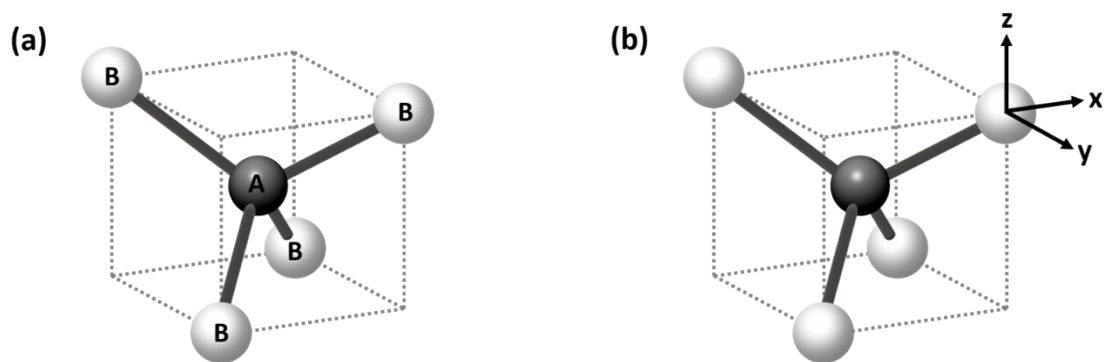

**Figure S2.** Scheme of a discrete  $AB_4$  molecule belonging to the  $T_d$  point group (a) and of the Cartesian coordinates used as vector basis to describe the atomic displacements (b).

A reducible representation in terms of the basis  $\nu$  can be determined by analyzing the effect of each symmetry operation  $R$  within the point group on the coordinate axes of each atom, according to the following equation (eq. 12 in Section 2.2):

$$\chi(R) = \omega(R)(\pm 1 + 2\cos\theta) \quad (\text{eq. S1})$$

where  $\chi(R)$  is the character of the reducible representation for the symmetry operation  $R$ ,  $\omega(R)$  the number of atoms that remain invariant under the same operation and  $\theta$  the rotation angle.

1) Identity operation, E

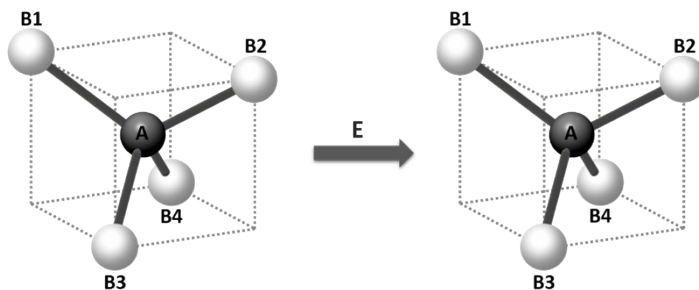

**Figure S3.** Scheme of the identity operation, E.

- Number of invariant/unshifted atoms: 5 (atoms A, B1, B2, B3 and B4).
- The identity operation can be regarded as a  $0^\circ$  proper rotation. Then:

$$\chi(E) = \omega(E)(1 + 2\cos\theta) = 5 \cdot (1 + 2\cos(0^\circ)) = 15$$

2) Three-fold proper rotation,  $C_3$

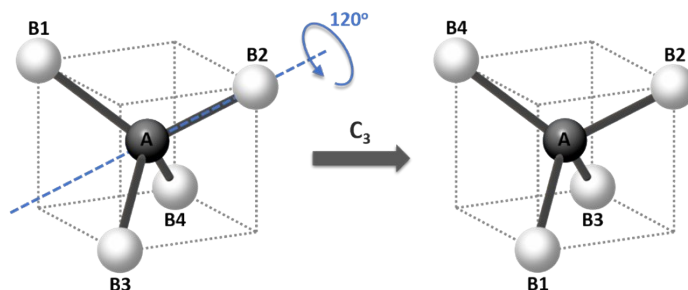

**Figure S4.** Scheme of the three-fold proper rotation,  $C_3$ .

- Number of invariant/unshifted atoms: 2 (atoms A and B2).
- A three-fold proper rotation implies a  $120^\circ$  rotation angle. Then:

$$\chi(C_3) = \omega(C_3)(1 + 2\cos\theta) = 2 \cdot (1 + 2\cos(120^\circ)) = 0$$

3) Two-fold proper rotation,  $C_2$

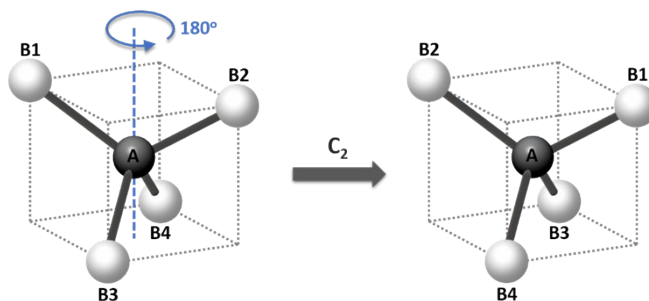

**Figure S5.** Scheme of the two-fold proper rotation,  $C_2$ .

- Number of invariant/unshifted atoms: 1 (atom A).
- A two-fold proper rotation implies a  $180^\circ$  rotation angle. Then:

$$\chi(C_2) = \omega(C_2)(1 + 2\cos\theta) = 1 \cdot (1 + 2\cos(180^\circ)) = -1$$

4) Four-fold improper rotation,  $S_4$

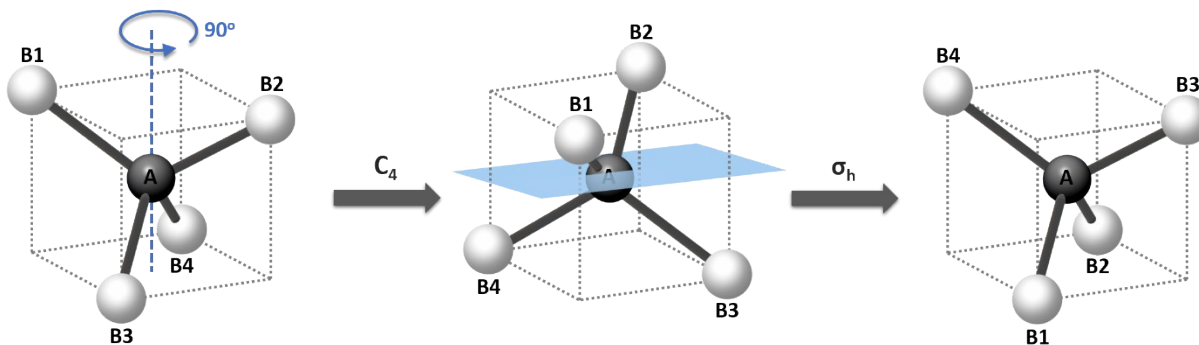

**Figure S6.** Scheme of the four-fold improper rotation,  $S_4$ .

- Number of invariant/unshifted atoms: 1 (atom A).
- A four-fold improper rotation implies a  $90^\circ$  improper rotation angle. Then:

$$\chi(S_4) = \omega(S_4)(-1 + 2\cos\theta) = 1 \cdot (-1 + 2\cos(90^\circ)) = -1$$

5) Diagonal/dihedral reflection plane,  $\sigma_d$

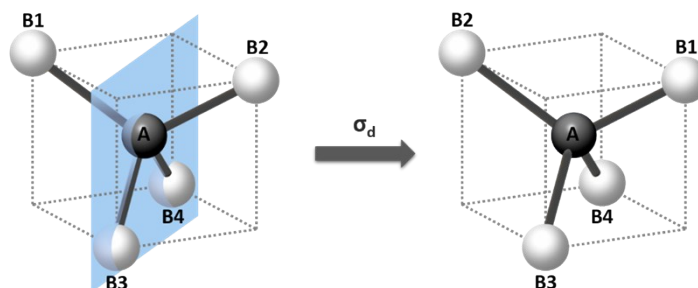

**Figure S7.** Scheme of the diagonal/dihedral reflection plane,  $\sigma_d$ .

- Number of invariant/unshifted atoms: 3 (atoms A, B3 and B4).
- A diagonal reflection plane can be regarded as a  $0^\circ$  improper rotation. Then:

$$\chi(\sigma_d) = \omega(\sigma_d)(-1 + 2\cos\theta) = 3 \cdot (-1 + 2\cos(0^\circ)) = 3$$

The as-obtained reducible representation is summarized in Table S-II.

**Table S-II.** Reducible representation of the  $AB_4$  molecule.

|               | E  | $8C_3$ | $3C_2$ | $6S_4$ | $6\sigma_d$ |
|---------------|----|--------|--------|--------|-------------|
| $\omega$      | 5  | 2      | 1      | 1      | 3           |
| $\Gamma_{3N}$ | 15 | 0      | -1     | -1     | 3           |

iii) **Apply the reduction formula in order to express the reducible representation in terms of the irreducible representations contained in the point group.** The reducible representation,  $\Gamma_{3N}$ , can be now expressed as a linear combination of the irreducible representations,  $\Gamma_i^{(i)}$  (included in the  $T_d$  point group), applying the reduction formula (eq. 13-14 in Section 2.2):

$$\Gamma_{3N} = \sum_i a_i \Gamma_i^{(i)} \quad ; \quad a_i = \frac{1}{h} \sum_R \chi(R) \cdot g(R) \cdot \chi_i^{(i)}(R) \quad (eq. S2)$$

where  $\chi(R)$  and  $\chi_i^{(i)}(R)$  are the characters of the reducible and the  $i$ -th irreducible representation for the symmetry operation  $R$  respectively,  $g(R)$  the number of symmetry operations  $R$  of the same class, and  $h$  the order of the group.



The order  $h$  of the group represents the total number of symmetry operations within the group, and can be readily calculated by taking into account the number of symmetry operations  $R$  of the same class included in the  $T_d$  point group:

$$h = \sum_R g(R) = g(E) + g(C_3) + g(C_2) + g(S_4) + g(\sigma_d) = 1 + 8 + 3 + 6 + 6 = 24$$

The calculation of the coefficients for each irreducible representation (according to eq. S2) is shown below:

$$a_{A_1} = \frac{1}{24}(15 \cdot 1 \cdot 1 + 0 \cdot 8 \cdot 1 + (-1) \cdot 3 \cdot 1 + (-1) \cdot 6 \cdot 1 + 3 \cdot 6 \cdot 1) = 1$$

$$a_{A_2} = \frac{1}{24}(15 \cdot 1 \cdot 1 + 0 \cdot 8 \cdot 1 + (-1) \cdot 3 \cdot 1 + (-1) \cdot 6 \cdot (-1) + 3 \cdot 6 \cdot (-1)) = 0$$

$$a_E = \frac{1}{24}(15 \cdot 1 \cdot 2 + 0 \cdot 8 \cdot (-1) + (-1) \cdot 3 \cdot 2 + (-1) \cdot 6 \cdot 0 + 3 \cdot 6 \cdot 0) = 1$$

$$a_{T_1} = \frac{1}{24}(15 \cdot 1 \cdot 3 + 0 \cdot 8 \cdot 0 + (-1) \cdot 3 \cdot (-1) + (-1) \cdot 6 \cdot 1 + 3 \cdot 6 \cdot (-1)) = 1$$

$$a_{T_2} = \frac{1}{24}(15 \cdot 1 \cdot 3 + 0 \cdot 8 \cdot 0 + (-1) \cdot 3 \cdot (-1) + (-1) \cdot 6 \cdot (-1) + 3 \cdot 6 \cdot 1) = 3$$

Therefore, the reducible representation can be reduced as follows:

$$\Gamma_{3N} = a_{A_1}A_1 + a_{A_2}A_2 + a_E E + a_{T_1}T_1 + a_{T_2}T_2 = A_1 + E + T_1 + 3T_2$$

iv) **Identify which of the previous irreducible representations correspond to molecular vibrations.** The previous expression constitutes the mechanical representation of the system, which includes the normal modes for all the molecular motions. Indeed, taking into account the degeneracy of each irreducible representation, the tetrahedral  $AB_4$  molecule displays 15 degrees of freedom, in agreement with the  $3N$  degrees of freedom expected for this system. Among them, three represent pure translations of the molecule, since all the atoms involved are displaced along the same direction at once, and are included under one  $T_2$  mode. When considering a crystal lattice,

these normal modes are usually referred to as acoustic modes, since they propagate as sound waves through the crystal. They can be easily identified from the first order terms in the character table, which in the case of the  $T_d$  point group correspond to one triple-degenerate  $T_2$  mode (see Table S-I). Additionally, for non-linear molecules three rotational degrees of freedom are also present. As it can be inferred from the character table, they are comprised under one  $T_1$  mode.

By subtracting the translational ( $\Gamma_{trans} = T_2$ ) and rotational ( $\Gamma_{rot} = T_1$ ) modes from the reducible representation, we end up with the irreducible representations corresponding to the vibrational modes of the  $AB_4$  molecule:

$$\Gamma_{vib} = \Gamma_{3N} - \Gamma_{trans} - \Gamma_{rot} = A_1 + E + 2T_2$$

For these vibrational modes to be Raman active a change in the polarizability is needed, whereas the selection rule for IR spectroscopy requires a change in dipolar moment. The quadratic terms in the character table lead to a change of the polarizability tensor, and hence determine the Raman active modes. These terms are associated to the  $A_1$ ,  $E$  and  $T_2$  irreducible representations, thereby rendering the four vibrational modes ( $A_1 + E + 2T_2$ ) active in Raman spectroscopy. On the other hand, the terms displaying linear symmetry are the ones implying a change in dipole moment, meaning that only two vibrational modes ( $2T_2$ ) will be detectable through IR spectroscopy.

Further insight into the nature of these vibrational modes can be gained reconsidering the theoretical analysis performed. In fact, instead of describing the atomic displacements (under each symmetry operation) in terms of the three coordinate axes on each atom, the use of internal coordinates allows to discern between the stretching and/or bending origin of these vibrational modes. These internal coordinates are based on the displacement of one atom with respect to another (generally the central atom) along the bond direction, as schematically shown in Figure S8.

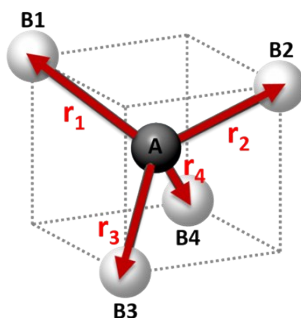

**Figure S8.** Scheme of the internal coordinates used as vector basis to describe the atomic displacements.

A reducible representation in terms of this new basis can be generated analyzing the effect of each symmetry operation  $R$  on the displacement vectors  $r_1$ ,  $r_2$ ,  $r_3$  and  $r_4$ .

- 1) Identity operation,  $E$ 
  - Number of invariant bonds: 4 ( $r_1$ ,  $r_2$ ,  $r_3$  and  $r_4$ )
- 2) Three-fold proper rotation,  $C_3$ 
  - Number of invariant bonds: 1 ( $r_2$ )
- 3) Two-fold proper rotation,  $C_2$ 
  - Number of invariant bonds: 0
- 4) Four-fold improper rotation,  $S_4$ 
  - Number of invariant bonds: 0
- 5) Diagonal/dihedral reflection plane,  $\sigma_d$ 
  - Number of invariant bonds: 2 ( $r_3$  and  $r_4$ )

Since the application of the symmetry operations does not modify the displacement vectors corresponding to the invariant bonds, the contribution of each symmetry operation (per invariant

bond) to the reducible representation is always 1. Therefore, the character of the reducible representation for the symmetry operation  $R$  is equal to the number of bonds that remain invariant under the same operation. Furthermore, bearing in mind the basis  $\nu$  considered, which was defined in terms of the relative displacement of each atom with respect to the central atom, the reducible representation does no longer represent the normal modes of all the molecular motions, but just the stretching vibrational modes of the  $AB_4$  molecule. This reducible representation, denoted by  $\Gamma_{stretching}$ , is summarized in Table S-III.

**Table S-III.** Reducible representation of the  $AB_4$  molecule as determined from the system internal coordinates.

|                       | E | $8C_3$ | $3C_2$ | $6S_4$ | $6\sigma_d$ |
|-----------------------|---|--------|--------|--------|-------------|
| Invariant bonds       | 4 | 1      | 0      | 0      | 2           |
| $\Gamma_{stretching}$ | 4 | 1      | 0      | 0      | 2           |

The previous reducible representation can be expressed again in terms of the irreducible representations upon applying the reduction formula:

$$a_{A_1} = \frac{1}{24}(4 \cdot 1 \cdot 1 + 1 \cdot 8 \cdot 1 + 0 \cdot 3 \cdot 1 + 0 \cdot 6 \cdot 1 + 2 \cdot 6 \cdot 1) = 1$$

$$a_{A_2} = \frac{1}{24}(4 \cdot 1 \cdot 1 + 1 \cdot 8 \cdot 1 + 0 \cdot 3 \cdot 1 + 0 \cdot 6 \cdot (-1) + 2 \cdot 6 \cdot (-1)) = 0$$

$$a_E = \frac{1}{24}(4 \cdot 1 \cdot 2 + 1 \cdot 8 \cdot (-1) + 0 \cdot 3 \cdot 2 + 0 \cdot 6 \cdot 0 + 2 \cdot 6 \cdot 0) = 0$$

$$a_{T_1} = \frac{1}{24}(4 \cdot 1 \cdot 3 + 1 \cdot 8 \cdot 0 + 0 \cdot 3 \cdot (-1) + 0 \cdot 6 \cdot 1 + 2 \cdot 6 \cdot (-1)) = 0$$

$$a_{T_2} = \frac{1}{24}(4 \cdot 1 \cdot 3 + 1 \cdot 8 \cdot 0 + 0 \cdot 3 \cdot (-1) + 0 \cdot 6 \cdot (-1) + 2 \cdot 6 \cdot 1) = 1$$

$$\Gamma_{stretching} = a_{A_1}A_1 + a_{A_2}A_2 + a_E E + a_{T_1}T_1 + a_{T_2}T_2 = A_1 + T_2$$

The previous results indicate that, among the four vibrational modes of the AB<sub>4</sub> molecule, two of them ( $A_1 + T_2$ ) correspond to stretching vibrations.

The bending vibrations can be easily determined by subtracting the stretching modes to the total number of vibrational modes:

$$\Gamma_{bending} = \Gamma_{vib} - \Gamma_{stretching} = E + T_2$$

Thus, the application of group theory to an AB<sub>4</sub> molecule belonging to the T<sub>d</sub> point group predicts four Raman active ( $A_1 + E + 2T_2$ ) and two IR active ( $2T_2$ ) modes, typically labelled as  $\nu_1(A_1)$ ,  $\nu_2(E)$ ,  $\nu_3(T_2)$  and  $\nu_4(T_2)$ .<sup>6</sup> Out of these vibrational modes,  $\nu_1$  and  $\nu_3$  correspond to purely stretching vibrations, whereas  $\nu_2$  and  $\nu_4$  involve bending vibrations, as shown in Figure S9.

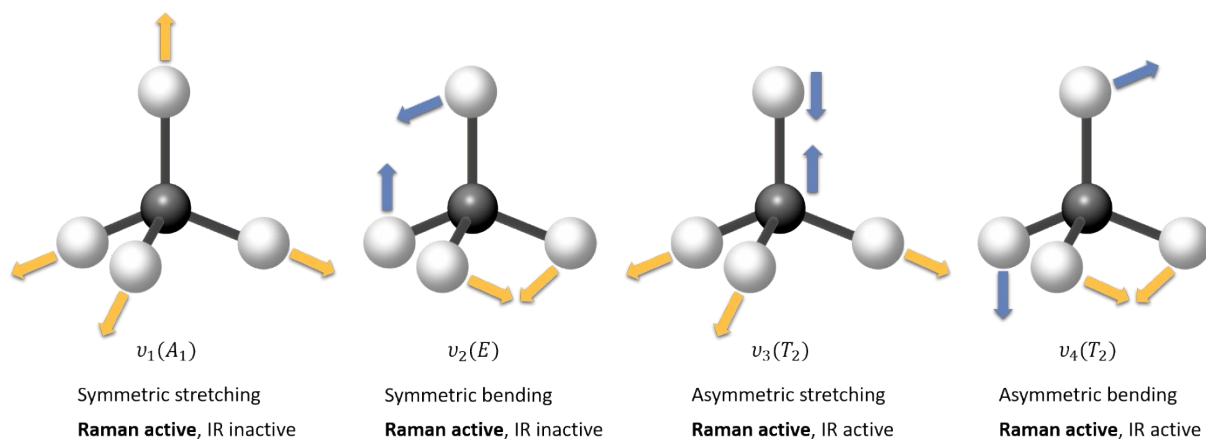

**Figure S9.** Scheme of the four vibrational modes of an AB<sub>4</sub> molecule belonging to the T<sub>d</sub> point group.

### 3. Normal vibrations of the five Raman active modes in the cubic spinel structure

Considering a primitive unit cell of the spinel structure, which comprises 14 atoms and three individual units (two  $AO_4$  units and one  $B_4$  group) displaying tetrahedral symmetry (point group  $T_d$ ), group theory predicts five Raman active modes, with schemes shown in Figure S10.

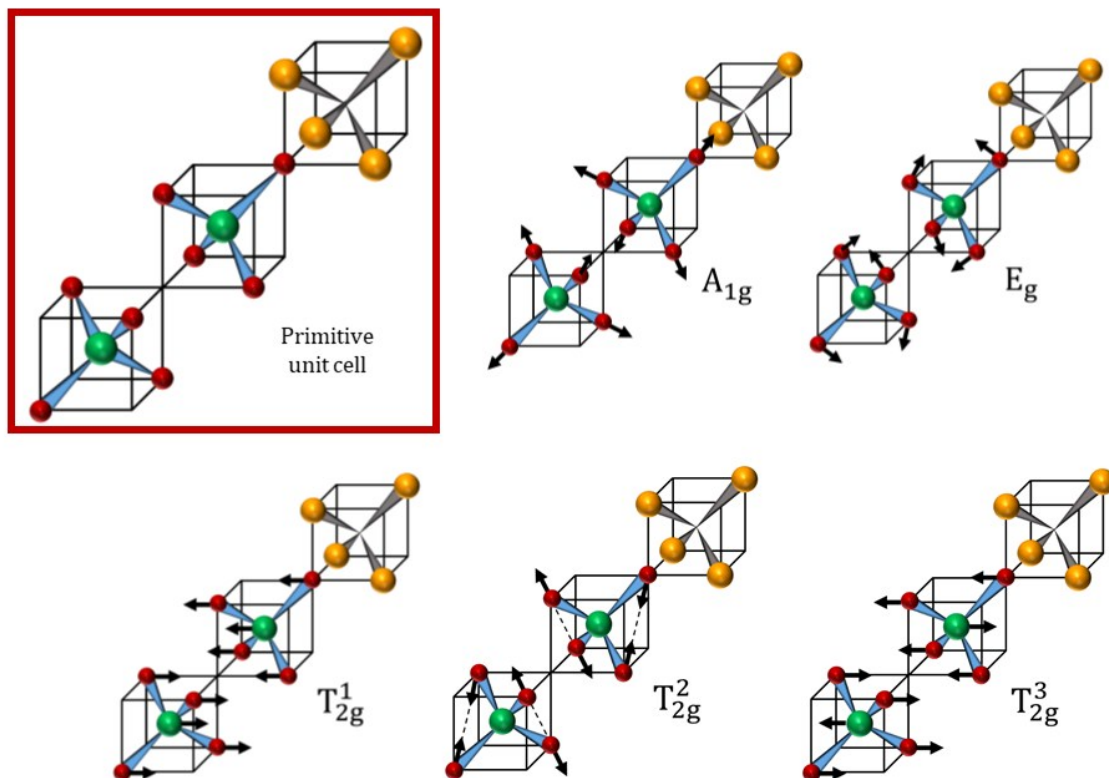

**Figure S10.** Schemes of the different vibration modes of the spinel structure (adapted from reference 8).

## References

1. B&W Tek site, Application note: P. Zhou. Choosing the most Suitable Laser Wavelength for your Raman Application. <http://bwtek.com/appnotes/choosing-the-most-suitable-laser-wavelength-for-your-raman-application> (accessed January 2019).

2. E. Smith, G. Dent, *Modern Raman Spectroscopy. A Practical Approach*, Chichester, Wiley, 2005.
3. S. D. Harvey, T. J. Peters, B. W. Wright, *Appl. Spectrosc.* 2003, **57** (5), 580-587.
4. O. N. Shebanova, P. Lazor, *J. Raman Spectrosc.*, 2003, **34**, 845–852.
5. B. Rivas-Murias, V. Salgueiriño, *J. Raman Spectrosc.*, 2017, **48**, 837–841.
6. J. Kreisel, M. C. Weber, N. Dix, F. Sánchez, P. A. Thomas, J. Fontcuberta, *Adv. Func. Mater.*, 2012, **22**, 5044-5049.
7. P. W. Atkins, M. S. Child, C. S. G. Phillips, *Tables for Group Theory*. Oxford University Press, Oxford, 2006.
8. J. L. Verble, *Phys. Rev. B* 1974, **9**, 5236–5248.
